# Supplementary material
Source: Elsevier journal article supplement (https://comptes-rendus.academie-sciences.fr/biologies/article/10.1016/j.crvi.2009.05.001/file/attach/mmc1.pdf)
Supplement: mmc1 [file mmc1.pdf]

Appendix 1.

| Species                            | CO2                    | Cyb                    | I2S                    | κCas                                           | PRKCI                  | SPTBN1                 | TG                     |
|------------------------------------|------------------------|------------------------|------------------------|------------------------------------------------|------------------------|------------------------|------------------------|
| <i>Muntiacus reevesi</i>           | NC_004069 <sup>1</sup> | NC_004069 <sup>1</sup> | NC_004069 <sup>1</sup> | U37509 <sup>28</sup>                           | AF165677 <sup>29</sup> | AF165678 <sup>29</sup> | AF165682 <sup>29</sup> |
| <i>Antilocapra americana</i>       | U62571 <sup>2</sup>    | AF091629 <sup>10</sup> | M55546 <sup>22</sup>   | AF165672 <sup>29</sup> /U37515 <sup>28</sup>   | AF165669 <sup>29</sup> | AF165670 <sup>29</sup> | AF165682 <sup>29</sup> |
| <i>Moschus moschiferus</i>         | DQ365691 <sup>3</sup>  | AY121995 <sup>11</sup> | AY121988 <sup>11</sup> | AY121997 <sup>11</sup>                         | DQ365693 <sup>3</sup>  | XXXXXX                 | XXXXXX                 |
| <i>Bos frontalis</i>               | AY689199 <sup>4</sup>  | AY689187 <sup>4</sup>  | XXXXXX                 | XXXXXX                                         | XXXXXX                 | XXXXXX                 | XXXXXX                 |
| <i>Bos grunniens</i>               | AY689200 <sup>4</sup>  | AF091631 <sup>10</sup> | AF091686 <sup>10</sup> | AY095312 <sup>30</sup>                         | XXXXXX                 | XXXXXX                 | XXXXXX                 |
| <i>Bos taurus</i>                  | NC_006853 <sup>5</sup> | NC_006853 <sup>5</sup> | NC_006853 <sup>5</sup> | XXXXXX                                         | AY029293 <sup>37</sup> | XXXXXX                 | XXXXXX                 |
| <i>Bison bison</i>                 | AY689197 <sup>4</sup>  | AF036273 <sup>12</sup> | AF091687 <sup>10</sup> | XXXXXX                                         | XXXXXX                 | XXXXXX                 | XXXXXX                 |
| <i>Bison bonasus</i>               | AY689198 <sup>4</sup>  | AY689186 <sup>4</sup>  | XXXXXX                 | U10379 <sup>31</sup>                           | XXXXXX                 | XXXXXX                 | XXXXXX                 |
| <i>Bubalus bubalis</i>             | NC_006295 <sup>6</sup> | NC_006295 <sup>6</sup> | AF231028 <sup>23</sup> | D14370 <sup>32</sup>                           | XXXXXX                 | XXXXXX                 | XXXXXX                 |
| <i>Bubalus depressicornis</i>      | U18822 <sup>7</sup>    | AF091632 <sup>10</sup> | AF091689 <sup>10</sup> | XXXXXX                                         | XXXXXX                 | XXXXXX                 | XXXXXX                 |
| <i>Syncerus caffer</i>             | U18825 <sup>7</sup>    | AF036275 <sup>12</sup> | AF091688 <sup>10</sup> | AF030328 <sup>33</sup>                         | AF210175 <sup>14</sup> | XXXXXX                 | XXXXXX                 |
| <i>Pseudoryx nghetinhensis</i>     | AY689265 <sup>4</sup>  | AF091635 <sup>10</sup> | AF091705 <sup>10</sup> | AY670667 <sup>20</sup>                         | XXXXXX                 | XXXXXX                 | XXXXXX                 |
| <i>Taurotragus derbianus</i>       | XXXXXX                 | AF022062 <sup>13</sup> | XXXXXX                 | XXXXXX                                         | AY667162 <sup>38</sup> | AY667232 <sup>38</sup> | XXXXXX                 |
| <i>Taurotragus oryx</i>            | XXXXXX                 | AF036278 <sup>12</sup> | AF091710 <sup>10</sup> | XXXXXX                                         | AF210176 <sup>14</sup> | AF210198 <sup>14</sup> | XXXXXX                 |
| <i>Tragelaphus imberbis</i>        | U18815 <sup>7</sup>    | AF036279 <sup>12</sup> | AF091697 <sup>10</sup> | AF165736 <sup>29</sup> /AF030330 <sup>33</sup> | XXXXXX                 | AY667237 <sup>38</sup> | XXXXXX                 |
| <i>Tragelaphus scriptus</i>        | XXXXXX                 | AF036277 <sup>12</sup> | AF091693 <sup>10</sup> | XXXXXX                                         | AY667176 <sup>38</sup> | AY667246 <sup>38</sup> | XXXXXX                 |
| <i>Tragelaphus speki</i>           | XXXXXX                 | AJ222680 <sup>12</sup> | AF091692 <sup>10</sup> | XXXXXX                                         | AY667174 <sup>38</sup> | AY667244 <sup>38</sup> | XXXXXX                 |
| <i>Tragelaphus strepsiceros</i>    | AY689206 <sup>4</sup>  | AF036280 <sup>12</sup> | AF091696 <sup>10</sup> | XXXXXX                                         | XXXXXX                 | XXXXXX                 | XXXXXX                 |
| <i>Boselaphus tragocamelus</i>     | U62566 <sup>8</sup>    | AJ222679 <sup>12</sup> | M86494 <sup>24</sup>   | AF165728 <sup>29</sup> /AF030331 <sup>33</sup> | AF165725 <sup>29</sup> | AF165726 <sup>29</sup> | AF165730 <sup>29</sup> |
| <i>Tetracerus quadricornis</i>     | AY689196 <sup>4</sup>  | AF036274 <sup>12</sup> | AF091690 <sup>10</sup> | AY670668 <sup>20</sup>                         | XXXXXX                 | XXXXXX                 | XXXXXX                 |
| <i>Aepyceros melampus</i>          | AY689194 <sup>4</sup>  | AF036289 <sup>12</sup> | M86496 <sup>24</sup>   | AY121998 <sup>11</sup>                         | AF165781 <sup>29</sup> | AF165782 <sup>29</sup> | AF165786 <sup>29</sup> |
| <i>Ammodorcas clarkei</i>          | XXXXXX                 | XXXXXX                 | XXXXXX                 | XXXXXX                                         | XXXXXX                 | XXXXXX                 | XXXXXX                 |
| <i>Antidorcas marsupialis</i>      | XXXXXX                 | AF036281 <sup>12</sup> | XXXXXX                 | XXXXXX                                         | AF210187 <sup>14</sup> | AF210209 <sup>14</sup> | XXXXXX                 |
| <i>Antilope cervicapra</i>         | XXXXXX                 | AF036283 <sup>12</sup> | XXXXXX                 | XXXXXX                                         | XXXXXX                 | XXXXXX                 | XXXXXX                 |
| <i>Dorcatragus megalotis</i>       | XXXXXX                 | XXXXXX                 | XXXXXX                 | XXXXXX                                         | XXXXXX                 | XXXXXX                 | XXXXXX                 |
| <i>Eudorcas rufifrons</i>          | XXXXXX                 | XXXXXX                 | XXXXXX                 | XXXXXX                                         | XXXXXX                 | XXXXXX                 | XXXXXX                 |
| <i>Eudorcas thomsonii</i>          | XXXXXX                 | XXXXXX                 | XXXXXX                 | XXXXXX                                         | XXXXXX                 | XXXXXX                 | XXXXXX                 |
| <i>Gazella bennettii</i>           | XXXXXX                 | XXXXXX                 | XXXXXX                 | XXXXXX                                         | XXXXXX                 | XXXXXX                 | XXXXXX                 |
| <i>Gazella cuvieri</i>             | XXXXXX                 | XXXXXX                 | XXXXXX                 | XXXXXX                                         | XXXXXX                 | XXXXXX                 | XXXXXX                 |
| <i>Gazella dorcas osiris</i>       | XXXXXX                 | XXXXXX                 | XXXXXX                 | XXXXXX                                         | XXXXXX                 | XXXXXX                 | XXXXXX                 |
| <i>Gazella dorcas pelzelni</i>     | XXXXXX                 | XXXXXX                 | XXXXXX                 | XXXXXX                                         | XXXXXX                 | XXXXXX                 | XXXXXX                 |
| <i>Gazella erlangeri</i>           | XXXXXX                 | XXXXXX                 | XXXXXX                 | XXXXXX                                         | XXXXXX                 | XXXXXX                 | XXXXXX                 |
| <i>Gazella gazella cora</i>        | XXXXXX                 | XXXXXX                 | XXXXXX                 | XXXXXX                                         | XXXXXX                 | XXXXXX                 | XXXXXX                 |
| <i>Gazella gazella gazella</i>     | XXXXXX                 | AJ222682 <sup>12</sup> | XXXXXX                 | XXXXXX                                         | XXXXXX                 | XXXXXX                 | XXXXXX                 |
| <i>Gazella leptoceros</i>          | XXXXXX                 | XXXXXX                 | XXXXXX                 | XXXXXX                                         | XXXXXX                 | XXXXXX                 | XXXXXX                 |
| <i>Gazella subgutturosa marica</i> | XXXXXX                 | XXXXXX                 | XXXXXX                 | XXXXXX                                         | XXXXXX                 | XXXXXX                 | XXXXXX                 |
| <i>Gazella subgutturosa</i>        | XXXXXX                 | AF036282 <sup>12</sup> | AY141134 <sup>25</sup> | XXXXXX                                         | XXXXXX                 | XXXXXX                 | XXXXXX                 |
| <i>Gazella spekei</i>              | XXXXXX                 | XXXXXX                 | XXXXXX                 | XXXXXX                                         | XXXXXX                 | XXXXXX                 | XXXXXX                 |
| <i>Litocranius walleri</i>         | XXXXXX                 | AF249974 <sup>14</sup> | XXXXXX                 | XXXXXX                                         | AF210188 <sup>14</sup> | AF210210 <sup>14</sup> | XXXXXX                 |
| <i>Madoqua kirkii</i>              | XXXXXX                 | AF022070 <sup>13</sup> | M86495 <sup>24</sup>   | XXXXXX                                         | AF165757 <sup>29</sup> | AF165758 <sup>29</sup> | AF165762 <sup>29</sup> |
| <i>Madoqua saltiana</i>            | XXXXXX                 | XXXXXX                 | XXXXXX                 | XXXXXX                                         | XXXXXX                 | XXXXXX                 | XXXXXX                 |
| <i>Nanger dama</i>                 | XXXXXX                 | XXXXXX                 | XXXXXX                 | XXXXXX                                         | XXXXXX                 | XXXXXX                 | XXXXXX                 |
| <i>Nanger granti</i>               | XXXXXX                 | AF034723 <sup>15</sup> | AY670652 <sup>20</sup> | XXXXXX                                         | XXXXXX                 | XXXXXX                 | XXXXXX                 |
| <i>Nanger soemmerringii</i>        | XXXXXX                 | XXXXXX                 | XXXXXX                 | XXXXXX                                         | XXXXXX                 | XXXXXX                 | XXXXXX                 |
| <i>Ourebia ourebi</i>              | XXXXXX                 | AF320574 <sup>16</sup> | XXXXXX                 | XXXXXX                                         | AF210196 <sup>14</sup> | AF210218 <sup>14</sup> | XXXXXX                 |
| <i>Procapra gutturosa</i>          | XXXXXX                 | XXXXXX                 | XXXXXX                 | XXXXXX                                         | XXXXXX                 | XXXXXX                 | XXXXXX                 |
| <i>Raphicerus campestris</i>       | XXXXXX                 | AF022068 <sup>13</sup> | XXXXXX                 | XXXXXX                                         | AF210189 <sup>14</sup> | AF210211 <sup>14</sup> | XXXXXX                 |
| <i>Saiga tatarica</i>              | XXXXXX                 | AF064487 <sup>15</sup> | AF363777 <sup>26</sup> | D32188 <sup>32</sup>                           | XXXXXX                 | XXXXXX                 | XXXXXX                 |
| <i>Neotragus moschatus</i>         | XXXXXX                 | AJ222683 <sup>12</sup> | AF091703 <sup>10</sup> | XXXXXX                                         | AF210192 <sup>14</sup> | AF210214 <sup>14</sup> | XXXXXX                 |
| <i>Cephalophus dorsalis</i>        | XXXXXX                 | AF153884 <sup>17</sup> | AF154248 <sup>17</sup> | AY122000 <sup>11</sup>                         | XXXXXX                 | XXXXXX                 | XXXXXX                 |
| <i>Philantomba monticola</i>       | XXXXXX                 | AF153893 <sup>17</sup> | XXXXXX                 | XXXXXX                                         | AF210194 <sup>14</sup> | AF210216 <sup>14</sup> | XXXXXX                 |
| <i>Sylvicapra grimmia</i>          | XXXXXX                 | AF153904 <sup>17</sup> | XXXXXX                 | XXXXXX                                         | AF210195 <sup>14</sup> | AF210217 <sup>14</sup> | XXXXXX                 |
| <i>Oreotragus oreotragus</i>       | XXXXXX                 | AF036288 <sup>12</sup> | AF091702 <sup>10</sup> | XXXXXX                                         | XXXXXX                 | XXXXXX                 | XXXXXX                 |
| <i>Kobus kob</i>                   | XXXXXX                 | AF052939 <sup>18</sup> | XXXXXX                 | XXXXXX                                         | XXXXXX                 | XXXXXX                 | XXXXXX                 |
| <i>Pelea capreolus</i>             | XXXXXX                 | AF022055 <sup>13</sup> | XXXXXX                 | XXXXXX                                         | AF210186 <sup>14</sup> | XXXXXX                 | XXXXXX                 |
| <i>Redunca fulvorufula</i>         | XXXXXX                 | AF036284 <sup>12</sup> | AF091704 <sup>10</sup> | AY121999 <sup>11</sup>                         | XXXXXX                 | XXXXXX                 | XXXXXX                 |
| <i>Addax nasomaculatus</i>         | XXXXXX                 | AF034722 <sup>15</sup> | XXXXXX                 | XXXXXX                                         | XXXXXX                 | XXXXXX                 | XXXXXX                 |
| <i>Hippotragus niger</i>           | AY846771 <sup>9</sup>  | AF036285 <sup>12</sup> | AY670653 <sup>20</sup> | AY122001 <sup>11</sup>                         | AY846795*              | DQ236281 <sup>34</sup> | AF165746 <sup>29</sup> |
| <i>Oryx leucoryx</i>               | XXXXXX                 | AF036286 <sup>12</sup> | XXXXXX                 | XXXXXX                                         | XXXXXX                 | XXXXXX                 | XXXXXX                 |
| <i>Alcelaphus buselaphus</i>       | XXXXXX                 | AJ222681 <sup>12</sup> | XXXXXX                 | XXXXXX                                         | AF210182 <sup>14</sup> | AF210203 <sup>14</sup> | XXXXXX                 |
| <i>Beatragus hunteri</i>           | XXXXXX                 | AF034968 <sup>19</sup> | U86988 <sup>27</sup>   | AF210159 <sup>14</sup>                         | AF210180 <sup>14</sup> | AF210202 <sup>14</sup> | XXXXXX                 |
| <i>Connochaetes gnou</i>           | XXXXXX                 | AF016637 <sup>13</sup> | XXXXXX                 | XXXXXX                                         | AF210182 <sup>14</sup> | AF210204 <sup>14</sup> | XXXXXX                 |
| <i>Damaliscus pygargus</i>         | AY689195 <sup>4</sup>  | AF036287 <sup>12</sup> | M86499 <sup>24</sup>   | AY122002 <sup>11</sup>                         | AY846794 <sup>9</sup>  | DQ236280 <sup>34</sup> | AF165778 <sup>29</sup> |
| <i>Ammotragus lervia</i>           | AY846772 <sup>9</sup>  | AF034731 <sup>15</sup> | AY670654 <sup>20</sup> | AY670670 <sup>20</sup>                         | AY846803 <sup>9</sup>  | DQ236282 <sup>34</sup> | DQ236302 <sup>34</sup> |
| <i>Arabitragus jayakari</i>        | AY846779 <sup>9</sup>  | AY846791 <sup>9</sup>  | AY846816 <sup>9</sup>  | DQ236300 <sup>34</sup>                         | AY846804 <sup>9</sup>  | DQ236289 <sup>34</sup> | DQ236309 <sup>34</sup> |
| <i>Buborcas taxicolor</i>          | AY846773 <sup>9</sup>  | AY669320 <sup>20</sup> | AY670655 <sup>20</sup> | AY670671 <sup>20</sup>                         | AY846811 <sup>9</sup>  | DQ236283 <sup>34</sup> | DQ236303 <sup>34</sup> |
| <i>Capra falconeri</i>             | AY846774 <sup>9</sup>  | AF034736 <sup>15</sup> | AY670656 <sup>20</sup> | AY670672 <sup>20</sup>                         | AY846797 <sup>9</sup>  | DQ236284 <sup>34</sup> | DQ236304 <sup>34</sup> |
| <i>Capra ibex</i>                  | AY846775 <sup>9</sup>  | AF034735 <sup>15</sup> | AY846815 <sup>9</sup>  | AF525023 <sup>35</sup>                         | AY846798 <sup>9</sup>  | DQ236285 <sup>34</sup> | DQ236305 <sup>34</sup> |
| <i>Capra nubiana</i>               | AY846776 <sup>9</sup>  | AF034740 <sup>15</sup> | AY670657 <sup>20</sup> | AY670673 <sup>20</sup>                         | AY846799 <sup>9</sup>  | DQ236286 <sup>34</sup> | DQ236306 <sup>34</sup> |
| <i>Capra sibirica</i>              | AY846777 <sup>9</sup>  | AF034734 <sup>15</sup> | AY670658 <sup>20</sup> | AY670674 <sup>20</sup>                         | AY846800 <sup>9</sup>  | DQ236287 <sup>34</sup> | DQ236307 <sup>34</sup> |
| <i>Capricornis sumatraensis</i>    | AY846781 <sup>9</sup>  | AY669321 <sup>20</sup> | AY670660 <sup>20</sup> | AY670676 <sup>20</sup>                         | AY846812 <sup>9</sup>  | DQ236291 <sup>34</sup> | DQ236311 <sup>34</sup> |
| <i>Hemitragus jemlahicus</i>       | AY846780 <sup>9</sup>  | AF034733 <sup>15</sup> | AY670659 <sup>20</sup> | AY670675 <sup>20</sup>                         | AY846801 <sup>9</sup>  | DQ236288 <sup>34</sup> | DQ236308 <sup>34</sup> |
| <i>Naemorhedus goral</i>           | XXXXXX                 | XXXXXX                 | AY141131 <sup>25</sup> | D32179 <sup>36</sup>                           | XXXXXX                 | XXXXXX                 | XXXXXX                 |
| <i>Nilgiritragus hylocrius</i>     | AY846778 <sup>9</sup>  | AY846792 <sup>9</sup>  | AY846817 <sup>9</sup>  | DQ236301 <sup>34</sup>                         | AY846809 <sup>9</sup>  | DQ236290 <sup>34</sup> | DQ236310 <sup>34</sup> |
| <i>Oreamnos americanus</i>         | AY846782 <sup>9</sup>  | AF190632 <sup>21</sup> | AY670661 <sup>20</sup> | AY670677 <sup>20</sup>                         | AY846814 <sup>9</sup>  | DQ236292 <sup>34</sup> | DQ236312 <sup>34</sup> |
| <i>Ovibos moschatus</i>            | AY846783 <sup>9</sup>  | AY669322 <sup>20</sup> | AY670662 <sup>20</sup> | AY670678 <sup>20</sup>                         | AY846813 <sup>9</sup>  | DQ236293 <sup>34</sup> | DQ236313 <sup>34</sup> |
| <i>Ovis aries</i>                  | AY846785 <sup>9</sup>  | AF034730 <sup>15</sup> | AY670663 <sup>20</sup> | AY670679 <sup>20</sup>                         | AY846806 <sup>9</sup>  | DQ236294 <sup>34</sup> | DQ236314 <sup>34</sup> |

|                             |                       |                        |                          |                        |                       |                        |                        |
|-----------------------------|-----------------------|------------------------|--------------------------|------------------------|-----------------------|------------------------|------------------------|
| <i>Ovis dalli</i>           | AY846786 <sup>9</sup> | AF034728 <sup>15</sup> | AY670664 <sup>20</sup>   | AY670680 <sup>20</sup> | AY846807 <sup>9</sup> | DQ236295 <sup>34</sup> | DQ236315 <sup>34</sup> |
| <i>Pantholops hodgsonii</i> | AY846787 <sup>9</sup> | AF034724 <sup>15</sup> | NC_007441 <sup>27b</sup> | AY670681 <sup>20</sup> | AY846796 <sup>9</sup> | DQ236299 <sup>34</sup> | DQ236319 <sup>34</sup> |
| <i>Pseudois nayaur</i>      | AY846788 <sup>9</sup> | AF034732 <sup>15</sup> | AY670665 <sup>20</sup>   | AY670682 <sup>20</sup> | AY846802 <sup>9</sup> | DQ236296 <sup>34</sup> | DQ236316 <sup>34</sup> |
| <i>Rupicapra pyrenaica</i>  | AY846789 <sup>9</sup> | AF034726 <sup>15</sup> | AY846818 <sup>9</sup>    | DQ236341 <sup>34</sup> | AY846810 <sup>9</sup> | DQ236297 <sup>34</sup> | DQ236318 <sup>34</sup> |
| <i>Rupicapra rupicapra</i>  | AY846790 <sup>9</sup> | AF034725 <sup>15</sup> | AY670666 <sup>20</sup>   | D32182 <sup>36</sup>   | AY846809 <sup>9</sup> | DQ236298 <sup>34</sup> | DQ236317 <sup>34</sup> |

\*AR et al., in prep; <sup>1</sup>Zhang et al. Unpublished; <sup>2</sup>Miyamoto et al. (1994); <sup>3</sup>Gilbert et al. (2006); <sup>4</sup>Hassanin and Ropiquet (2004); <sup>5</sup>Lowe et al. (1997); <sup>6</sup>Qian et al. Unpublished; <sup>7</sup>Honeycutt et al. (1995); <sup>8</sup>Janecek et al. (1996); <sup>9</sup>Ropiquet and Hassanin (2005b); <sup>10</sup> Hassanin and Douzery (1999a); <sup>11</sup>Hassanin and Douzery (2003); <sup>12</sup>Hassanin and Douzery (1999b); <sup>13</sup>Matthee and Robinson (1999); <sup>14</sup>Matthee and Davis (2001); <sup>15</sup>Hassanin et al. (1998a); <sup>16</sup>Birungi and Arctander (2001); <sup>17</sup>van Vuuren and Robinson (2001); <sup>18</sup>Birungi et al. (1998); <sup>19</sup>Pitra et al. (1998); <sup>20</sup>Ropiquet and Hassanin (2005a); <sup>21</sup>Hassanin and Douzery (2000); <sup>22</sup>Kraus and Miyamoto; <sup>23</sup>Kuznetsov et al. (2001); <sup>24</sup>Allard et al. (1992); <sup>25</sup>Kuznetsova and Kholodova. Unpublished; <sup>26</sup>Kuznetsova and Kholodova (2002); <sup>27</sup>Gatesy et al. (1997); <sup>27b</sup>Xu et al. (2005); <sup>28</sup>Cronin et al. (1996); <sup>29</sup>Matthee et al. (2001); <sup>30</sup>Prinzenberg et al. Unpublished; <sup>31</sup>Burzynska et al. (1995); <sup>32</sup>Chikuni et al. (1994); <sup>33</sup>Ward et al. (1997); <sup>34</sup>Ropiquet and Hassanin (2006); <sup>35</sup>Jann et al. (2003); <sup>36</sup>Chikuni et al. (1995); <sup>37</sup>De Donato et al. (2001); <sup>38</sup>Willows-Munro et al. 2005.
